# Supplementary material
Source: PubMed Central journal article supplement (PMC2713006)
Supplement: NIHMS99286-supplement-1.pdf [file NIHMS99286-supplement-1.pdf]

Table 1. qPCR primer sequences and conditions

| <i>Gene</i>                     | Primer/probe sequence |
|---------------------------------|-----------------------|
| <i>IL-7</i> Applied Biosystems  | Mm00434291_m1         |
| <i>IL-7r</i> Applied Biosystems | Mm00434295_m1         |
| <i>HPRT</i> Applied Biosystems  | Mm00446968_m1         |

**a**

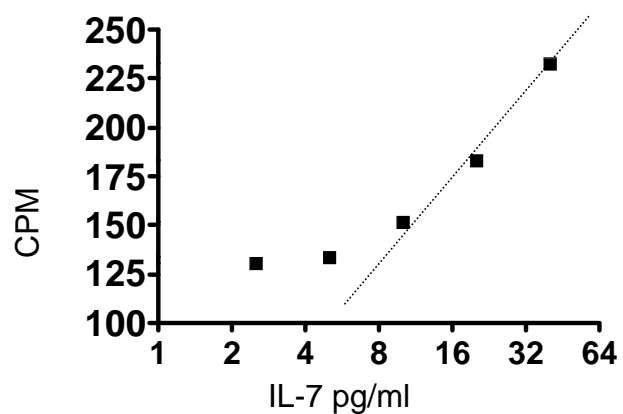

**b**

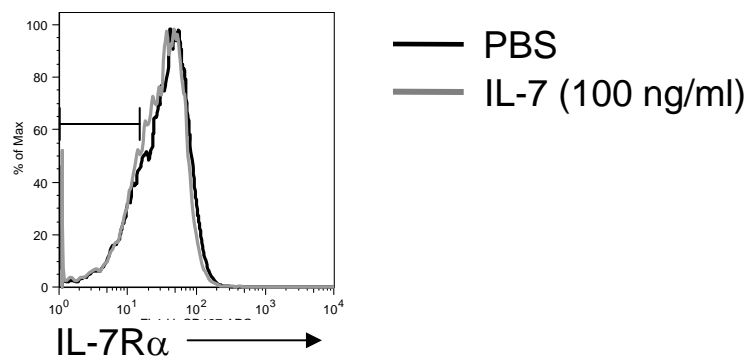

**Supplementary Figure 1 (a)** Standard curve of rmIL-7 measured by 2E8 cell proliferation. **(b)** Pre-incubation with a high concentration of IL-7 did not prevent IL-7R $\alpha$  detection by flow cytometry. LN T cells were seeded in 24-well plates and incubated with PBS or rhIL-7 for 30 min. IL-7R $\alpha$  expression was analyzed via flow cytometry.

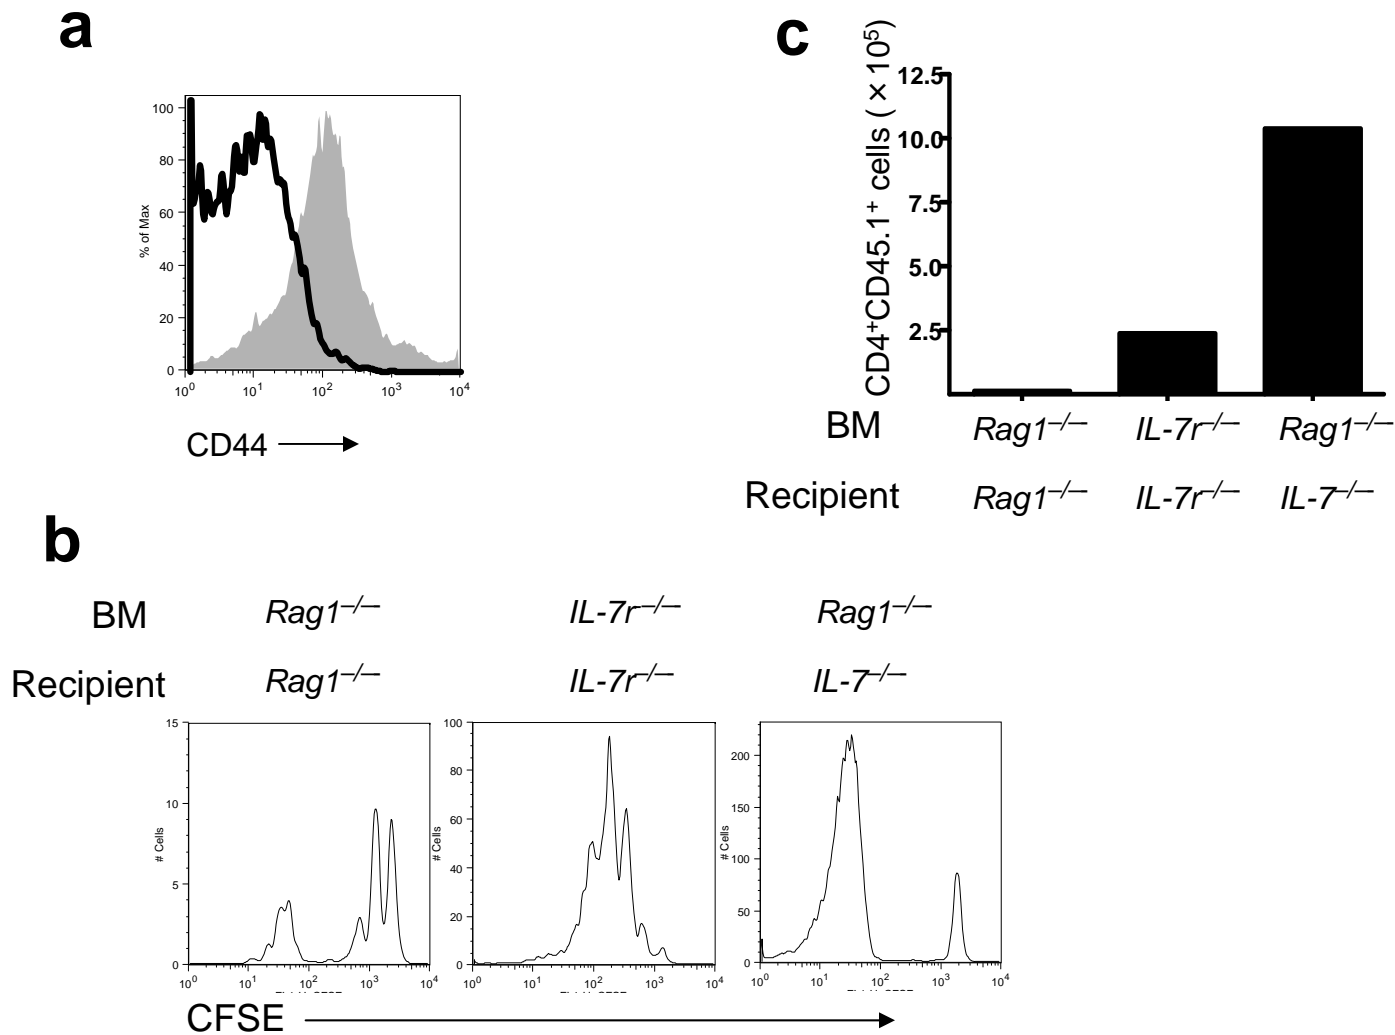

**Supplementary Figure 2** IL-7 signaling in BM-derived cells prevents efficient CD4<sup>+</sup> T cell homeostatic proliferation and accumulation of naïve (CD44<sup>low</sup>) polyclonal T cells. **(a)** CD44 expression on CD45.1<sup>+</sup> LN T cells depleted of CD44<sup>hi</sup> cells (grey histogram). Open histogram, isotype control. **(b,c)** CFSE-labeled CD44<sup>low</sup> polyclonal CD4<sup>+</sup> T cells were transferred into indicated BM chimeras. Seven days later, CFSE dilution was measured **(b)** and CD4<sup>+</sup>CD45.1<sup>+</sup> T cells in the spleen were enumerated **(c)**. Results are representative of 2 independent experiments.

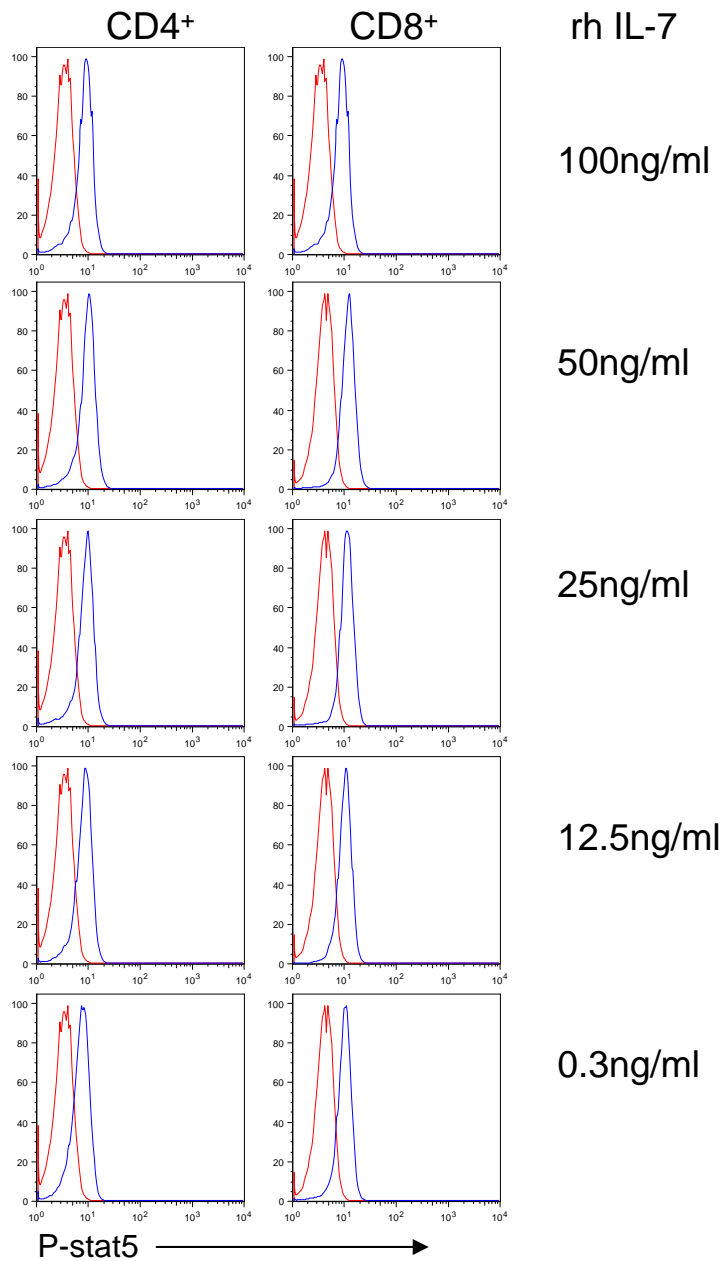

**Supplementary Figure 3** CD4<sup>+</sup> and CD8<sup>+</sup> T cells sustain equal STAT5 phosphorylation following exposure to limiting amounts of rhIL-7 *ex vivo*. LN T cells were seeded in 24-well plates ( $1 \times 10^6$ /ml) and incubated with diminishing concentrations of IL-7 for 45 min. STAT5 phosphorylation was analyzed by intracellular flow cytometric analysis. Red, PBS alone; blue, IL-7.

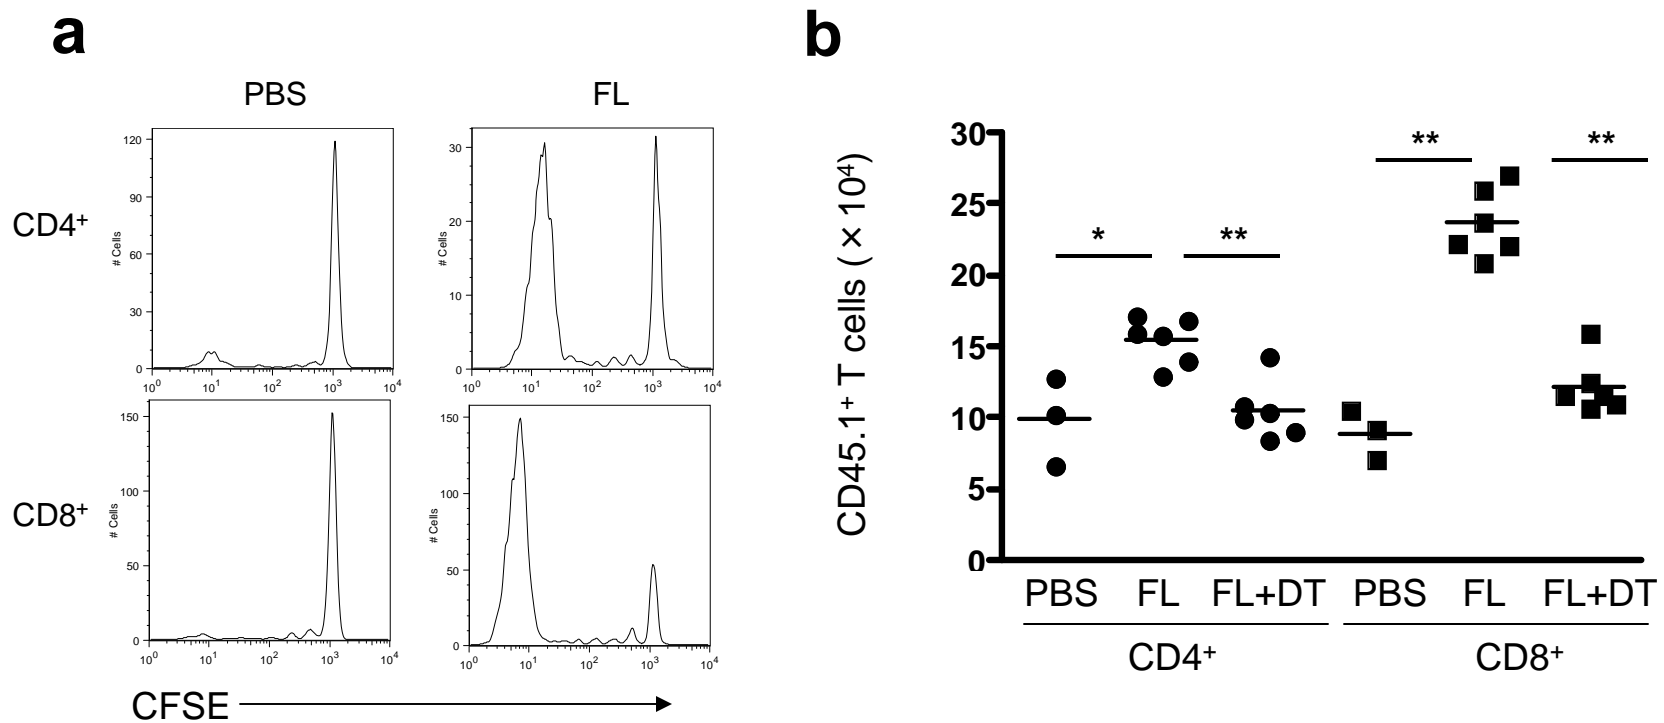

**Supplementary Figure 4** FLT3 ligand induces CD4<sup>+</sup> T cell homeostatic proliferation. CD45.1<sup>+</sup> LN T cells were labeled with CFSE and transferred into the BM-chimeras generated by transfer of CD11c-DTR BM into wild-type recipients. Mice were treated with PBS or FLT3 ligand (10mg/day) for 14 d. **(a)** CFSE dilution of CD45.1<sup>+</sup> T cells. **(b)** Enumeration of splenic CD45.1<sup>+</sup> T cells. Horizontal lines indicate mean, and each dot represents an individual mouse. DT (4ng/kg body weight) was administered on day 0, +4, +8 and +12 to ablate CD11c<sup>hi</sup> cells ( $n=3-6$  mice/group). \*,  $P<0.01$  and \*\*,  $P<0.001$ .

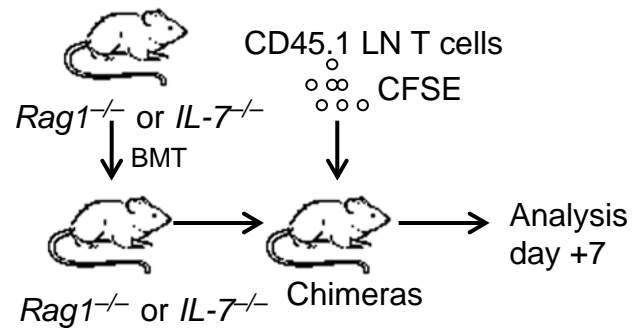

**Supplementary Figure 5** Schematic representation of the experimental model. *Rag1*<sup>-/-</sup> and *Il7*<sup>-/-</sup> mice were used as donors or recipients to create hematopoietic BM-chimeras wherein IL-7 production was limited to radioresistant stroma or BM-derived cells. Five weeks after BMT, mice received CFSE labeled congenic LN T cells.

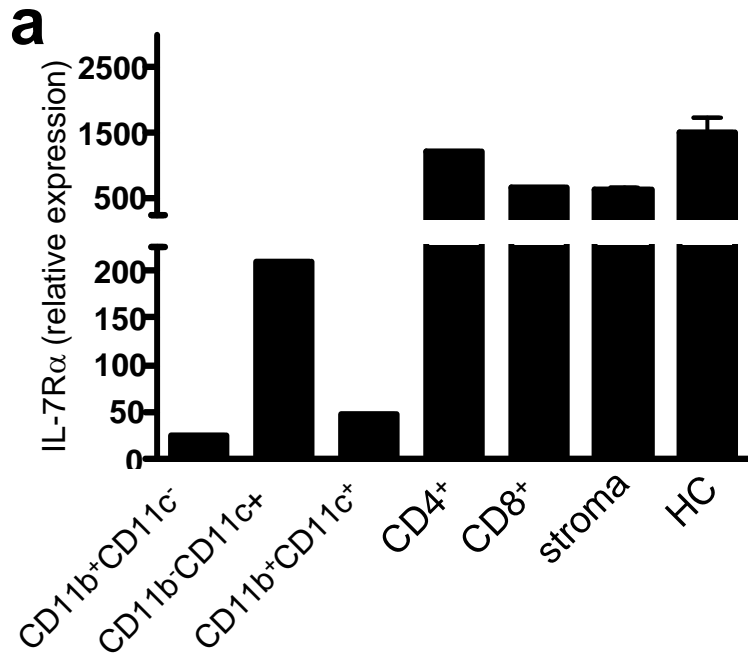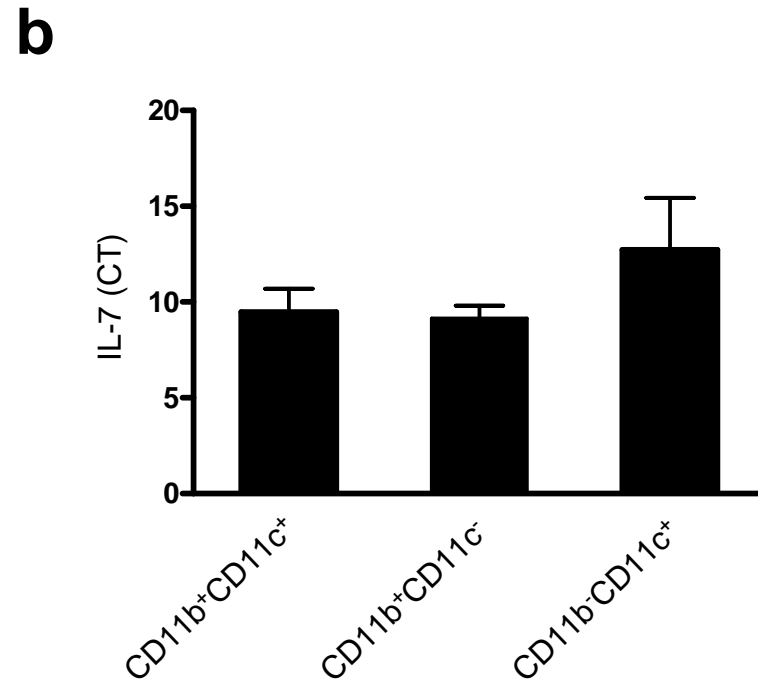

**Supplementary Figure 6** IL-7R $\alpha$  mRNA expression in electronically sorted cell spleen subpopulations was measured by qRT-PCR. HC denotes hematopoietic cells. B) IL-7 relative expression according to the comparative CT method. 3 mice per group were analyzed.

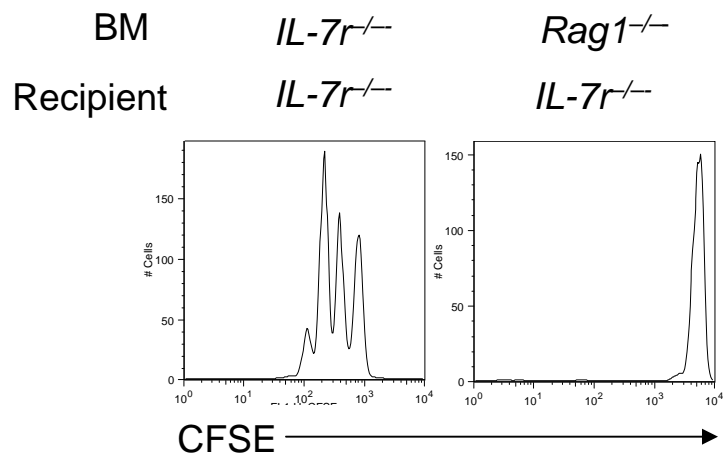

**Supplementary Figure 7** IL-7 signaling in APCs prevents CD4<sup>+</sup> T cell homeostatic proliferation in *Il7r<sup>-/-</sup>* mice. CFSE-labeled TCR Tg<sup>+</sup> T cells were adoptively transferred into indicated BM chimeras. Seven days later, mice were sacrificed and CFSE dilution was analyzed. (*n*=3-6 mice/group). Results are representative of 2 independent experiments.
